# Supplementary material for: The EuroFlow PID Orientation Tube for Flow Cytometric Diagnostic Screening of Primary Immunodeficiencies of the Lymphoid System
Source: PubMed Central journal article supplement (PMC6410673; doi:10.3389/fimmu.2019.00246), 2019-03-04
Supplement: Table_1.pdf [file Table_1.pdf]

**Supplementary Table 1: Successive versions of the screening tube**

| Version      | PacB/BV421      | PacO/BV510      | FITC      | PE            | PerCPCy 5.5 | PECy7      | APC | APC-A750   |
|--------------|-----------------|-----------------|-----------|---------------|-------------|------------|-----|------------|
| 1            | CD4+IgM<br>PacB | CD45<br>PacO    | CD8+smlgD | CD16<br>+CD56 | CD27        | CD19+TCRgd | CD3 | CD38       |
| 2            | CD27 BV421      | CD45<br>PacO    | CD8+smlgD | CD16<br>+CD56 | CD4+IgM     | CD19+TCRgd | CD3 | CD38       |
| 3            | CD27 BV421      | CD45<br>PacO    | CD8+smlgD | CD16<br>+CD56 | CD4+IgM     | CD19+TCRgd | CD3 | CD45R<br>A |
| 4<br>(Final) | CD27 BV421      | CD45RA<br>BV510 | CD8+smlgD | CD16<br>+CD56 | CD4+IgM     | CD19+TCRgd | CD3 | CD45       |
