# Supplementary material for: The EuroFlow PID Orientation Tube for Flow Cytometric Diagnostic Screening of Primary Immunodeficiencies of the Lymphoid System
Source: PubMed Central journal article supplement (PMC6410673; doi:10.3389/fimmu.2019.00246), 2019-03-04
Supplement: Table_2.pdf [file Table_2.pdf]

**Supplementary Table 2: Frequency of patients with inborn errors of immunity showing defects of the T-cells subsets identified in the EF PIDOT, as compared to age-reference values.**

| Disease                                         | CD4 <sup>+</sup> TCRgd <sup>-</sup> T-cells |             |            | CD8 <sup>+</sup> TCRgd <sup>-</sup> T-cells |             |            | DNT TCRgd <sup>-</sup> T-cells | TCRgd <sup>+</sup> T-cells | Any of them |
|-------------------------------------------------|---------------------------------------------|-------------|------------|---------------------------------------------|-------------|------------|--------------------------------|----------------------------|-------------|
|                                                 | Total                                       | Naïve       | CM         | Total                                       | Naïve       | CM         |                                |                            |             |
| <b>SCID (n=24)</b>                              | <b>88%</b>                                  | <b>100%</b> | <b>67%</b> | <b>83%</b>                                  | <b>100%</b> | <b>52%</b> | <b>0%</b>                      | <b>79%</b>                 | <b>100%</b> |
| IL2Rg                                           | 6/6                                         | 6/6         | 4/6        | 5/6                                         | 6/6         | 2/6        | 0/6                            | 5/6                        | 6/6         |
| IL7R                                            | 1/1                                         | 1/1         | 1/1        | 1/1                                         | 1/1         | 1/1        | 0/1                            | 1/1                        | 1/1         |
| RAG1                                            | 6/8                                         | 8/8         | 4/6        | 7/8                                         | 8/8         | 3/6        | 0/8                            | 7/8                        | 8/8         |
| RAG2                                            | 4/5                                         | 5/5         | 5/5        | 4/5                                         | 5/5         | 5/5        | 1/5                            | 3/5                        | 5/5         |
| DCLRE1C                                         | 3/3                                         | 3/3         | NA         | 3/3                                         | 3/3         | NA         | 0/3                            | 3/3                        | 3/3         |
| NHEJ1                                           | 1/1                                         | 1/1         | 0/1        | 0/1                                         | 1/1         | 0/1        | 0/1                            | 0/1                        | 1/1         |
| <b>CID (n=12)</b>                               | <b>17%</b>                                  | <b>17%</b>  | <b>17%</b> | <b>25%</b>                                  | <b>42%</b>  | <b>17%</b> | <b>8%</b>                      | <b>0%</b>                  | <b>60%</b>  |
| CD40L                                           | 0/6                                         | 0/6         | 0/6        | 0/6                                         | 0/6         | 0/6        | 1/6                            | 0/6                        | 1/6         |
| ZAP70                                           | 0/3                                         | 0/3         | 0/3        | 3/3                                         | 3/3         | 1/3        | 1/3                            | 0/3                        | 3/3         |
| DOCK8                                           | 2/2                                         | 2/2         | ½          | 0/2                                         | 2/2         | 0/2        | 0/2                            | 0/2                        | 2/2         |
| BCL10                                           | 0/1                                         | 0/1         | 1/1        | 0/1                                         | 0/1         | 1/1        | 0/1                            | 0/1                        | 1/1         |
| <b>CID with syndromic features (n=20)</b>       | <b>25%</b>                                  | <b>50%</b>  | <b>5%</b>  | <b>30%</b>                                  | <b>55%</b>  | <b>5%</b>  | <b>15%</b>                     | <b>5%</b>                  | <b>70%</b>  |
| WASp                                            | 0/3                                         | 0/3         | 0/3        | 2/3                                         | 3/3         | 1/3        | 0/3                            | 0/3                        | 3/3         |
| ATM                                             | 2/6                                         | 5/6         | 0/6        | 1/6                                         | 5/6         | 0/6        | 0/6                            | 0/6                        | 5/6         |
| Di George                                       | 1/6                                         | 2/6         | 0/6        | 2/6                                         | 2/6         | 0/6        | 2/6                            | 0/6                        | 3/6         |
| STAT3                                           | 0/2                                         | 1/2         | 0/2        | 0/2                                         | 0/2         | 0/2        | 1/2                            | 0/2                        | 1/2         |
| NEMO                                            | 1/2                                         | 1/2         | 1/2        | 0/2                                         | 0/2         | 0/2        | 0/2                            | 0/2                        | 1/2         |
| PNP                                             | 1/1                                         | 1/1         | 0/1        | 1/1                                         | 1/1         | 0/1        | 0/1                            | 1/1                        | 1/1         |
| <b>PAD (n=16)</b>                               | <b>13%</b>                                  | <b>25%</b>  | <b>13%</b> | <b>0%</b>                                   | <b>25%</b>  | <b>0%</b>  | <b>0%</b>                      | <b>13%</b>                 | <b>31%</b>  |
| BTK                                             | 0/10                                        | 0/10        | 0/10       | 0/10                                        | 0/10        | 0/10       | 0/10                           | 1/10                       | 1/10        |
| PI3KCD                                          | 2/5                                         | 4/5         | 2/5        | 0/5                                         | 4/5         | 0/5        | 0/5                            | 1/5                        | 4/5         |
| AID                                             | 0/1                                         | 0/1         | 0/1        | 0/1                                         | 0/1         | 0/1        | 0/1                            | 0/1                        | 0/1         |
| <b>Disease of immune dysregulation (n=10)</b>   | <b>0%</b>                                   | <b>30%</b>  | <b>10%</b> | <b>0%</b>                                   | <b>20%</b>  | <b>10%</b> | <b>40%</b>                     | <b>0%</b>                  | <b>70%</b>  |
| Syntaxin                                        | 0/1                                         | 1/1         | 0/1        | 0/1                                         | 1/1         | 0/1        | 0/1                            | 0/1                        | 1/1         |
| FAS                                             | 0/5                                         | 1/5         | 0/5        | 0/5                                         | 0/5         | 0/5        | 4/5                            | 0/5                        | 5/5         |
| XLP                                             | 0/1                                         | 0/1         | 0/1        | 0/1                                         | 0/1         | 0/1        | 0/1                            | 0/1                        | 0/1         |
| CD27                                            | 0/1                                         | 1/1         | 1/1        | 0/1                                         | 1/1         | 1/1        | 0/1                            | 0/1                        | 1/1         |
| CTPS1                                           | 0/2                                         | 0/2         | 0/2        | 0/2                                         | 0/2         | 0/2        | 0/2                            | 0/2                        | 0/2         |
| <b>Defects of phagocytes or function (n=10)</b> | <b>20%</b>                                  | <b>10%</b>  | <b>20%</b> | <b>0%</b>                                   | <b>0%</b>   | <b>10%</b> | <b>0%</b>                      | <b>0%</b>                  | <b>30%</b>  |
| CGD                                             | 1/5                                         | 0/5         | 0/5        | 0/5                                         | 0/5         | 0/5        | 0/5                            | 0/5                        | 1/5         |
| GATA2                                           | 1/5                                         | 1/5         | 2/5        | 0/5                                         | 0/5         | 1/5        | 0/5                            | 0/5                        | 2/5         |
| <b>Defects innate immunity (n=3)</b>            | <b>33%</b>                                  | <b>67%</b>  | <b>0%</b>  | <b>33%</b>                                  | <b>33%</b>  | <b>33%</b> | <b>67%</b>                     | <b>33%</b>                 | <b>67%</b>  |
| STAT1                                           | 0/1                                         | 1/1         | 0/1        | 0/1                                         | 0/1         | 0/1        | 1/1                            | 0/1                        | 1/1         |
| WHIM                                            | 1/1                                         | 1/1         | 0/1        | 1/1                                         | 1/1         | 1/1        | 1/1                            | 1/1                        | 1/1         |
| IRAK4                                           | 0/1                                         | 0/1         | 0/1        | 0/1                                         | 0/1         | 0/1        | 0/1                            | 0/1                        | 0/1         |
| <b>Complement deficiencies (n=4)</b>            | <b>0%</b>                                   | <b>0%</b>   | <b>0%</b>  | <b>0%</b>                                   | <b>0%</b>   | <b>0%</b>  | <b>0%</b>                      | <b>0%</b>                  | <b>0%</b>   |

Results expressed as percentage of patients showing absolute counts below the lower limit of normality, compared to age-reference values obtained from 250 healthy donors analyzed with the same protocol, except for DNT TCRgd<sup>-</sup> T-cells that is expressed as percentage of patients showing >6% from total TCRgd<sup>-</sup> T-cells. SCID: Severe Combined Immunodeficiency. CID: Combined Immunodeficiency. PAD: Predominantly Antibody Deficiency. CM/TM: Central/Transitional Memory. NA: Not available.
