# Supplementary material for: The EuroFlow PID Orientation Tube for Flow Cytometric Diagnostic Screening of Primary Immunodeficiencies of the Lymphoid System
Source: PubMed Central journal article supplement (PMC6410673; doi:10.3389/fimmu.2019.00246), 2019-03-04
Supplement: Table_3.pdf [file Table_3.pdf]

**Supplementary Table 3: Frequency of patients with inborn errors of immunity showing defects of the B-cells subsets identified in the EF PIDOT, as compared to age-reference values.**

| Disease                                         | PreGC      | MBC/PC      | Unswitched MBC/PC | Switched MBC/PC | Any of them |
|-------------------------------------------------|------------|-------------|-------------------|-----------------|-------------|
| <b>SCID (n=24)</b>                              | <b>75%</b> | <b>100%</b> | <b>100%</b>       | <b>100%</b>     | <b>100%</b> |
| IL2Rg                                           | 1/6        | 6/6         | 6/6               | 6/6             | 6/6         |
| IL7R                                            | 0/1        | 1/1         | 1/1               | 1/1             | 1/1         |
| RAG1                                            | 8/8        | 8/8         | 8/8               | 8/8             | 8/8         |
| RAG2                                            | 5/5        | 5/5         | 5/5               | 5/5             | 5/5         |
| DCLRE1C                                         | 3/3        | 3/3         | 3/3               | 3/3             | 3/3         |
| NHEJ1                                           | 1/1        | 1/1         | 1/1               | 1/1             | 1/1         |
| <b>CID (n=12)</b>                               | <b>8%</b>  | <b>42%</b>  | <b>42%</b>        | <b>83%</b>      | <b>83%</b>  |
| CD40L                                           | 0/6        | 1/6         | 1/6               | 6/6             | 6/6         |
| ZAP70                                           | 0/3        | 1/3         | 1/3               | 1/3             | 1/3         |
| DOCK8                                           | 1/2        | 2/2         | 2/2               | 2/2             | 2/2         |
| BCL10                                           | 0/1        | 1/1         | 1/1               | 1/1             | 1/1         |
| <b>CID with syndromic features (n=20)</b>       | <b>25%</b> | <b>45%</b>  | <b>45%</b>        | <b>45%</b>      | <b>60%</b>  |
| WASp                                            | 0/3        | 3/3         | 3/3               | 1/3             | 3/3         |
| ATM                                             | 3/6        | 4/6         | 3/6               | 4/6             | 4/6         |
| Di George                                       | 1/6        | 1/6         | 1/6               | 1/6             | 1/6         |
| STAT3                                           | 0/2        | 0/2         | 1/2               | 1/2             | 2/2         |
| NEMO                                            | 0/2        | 1/2         | 1/2               | 1/2             | 1/2         |
| PNP                                             | 1/1        | 0/1         | 0/1               | 1/1             | 1/1         |
| <b>PAD (n=16)</b>                               | <b>75%</b> | <b>94%</b>  | <b>94%</b>        | <b>94%</b>      | <b>100%</b> |
| BTK                                             | 10/10      | 10/10       | 10/10             | 10/10           | 10/10       |
| PI3KCD                                          | 2/5        | 5/5         | 5/5               | 4/5             | 5/5         |
| AID                                             | 0/1        | 0/1         | 0/1               | 1/1             | 1/1         |
| <b>Disease of immune dysregulation (n=10)</b>   | <b>20%</b> | <b>40%</b>  | <b>40%</b>        | <b>50%</b>      | <b>60%</b>  |
| Syntaxin                                        | 1/1        | 1/1         | 0/1               | 1/1             | 1/1         |
| FAS                                             | 0/5        | 2/5         | 2/5               | 2/5             | 2/5         |
| XLP                                             | 0/1        | 0/1         | 0/1               | 1/1             | 1/1         |
| CD27                                            | 0/1        | 0/1         | 1/1               | 0/1             | 1/1         |
| CTPS1                                           | 1/2        | 1/2         | 1/2               | 1/2             | 1/2         |
| <b>Defects of phagocytes or function (n=10)</b> | <b>20%</b> | <b>40%</b>  | <b>30%</b>        | <b>50%</b>      | <b>60%</b>  |
| CGD                                             | 0/5        | 2/5         | 2/5               | 2/5             | 3/5         |
| GATA2                                           | 2/5        | 2/5         | 1/5               | 3/5             | 3/5         |
| <b>Defects innate immunity (n=3)</b>            | <b>33%</b> | <b>67%</b>  | <b>67%</b>        | <b>67%</b>      | <b>67%</b>  |
| STAT1                                           | 0/1        | 1/1         | 1/1               | 1/1             | 1/1         |
| WHIM                                            | 1/1        | 1/1         | 1/1               | 1/1             | 1/1         |
| IRAK4                                           | 0/1        | 0/1         | 0/1               | 0/1             | 0/1         |
| <b>Complement deficiencies (n=4)</b>            | <b>0%</b>  | <b>0%</b>   | <b>0%</b>         | <b>0%</b>       | <b>0%</b>   |

Results expressed as percentage of patients showing absolute counts below the lower limit of normality, compared to age-reference values obtained from 250 healthy donors analyzed with the same protocol. SCID: Severe Combined Immunodeficiency. CID: Combined Immunodeficiency. PAD: Predominantly Antibody Deficiency. MBC/PC: Memory B-cells/Plasma cells.
