# Supplementary material for: The EuroFlow PID Orientation Tube for Flow Cytometric Diagnostic Screening of Primary Immunodeficiencies of the Lymphoid System
Source: PubMed Central journal article supplement (PMC6410673; doi:10.3389/fimmu.2019.00246), 2019-03-04
Supplement: Table_4.pdf [file Table_4.pdf]

**Supplementary Table 4: Reference values for absolute counts of peripheral blood leukocytes subpopulations calculated with the Euroflow PID orientation tube in healthy controls per age group.**

|                                        | CB<br>(n=15) | NB<br>(n=16) | 1-5 m<br>(n=12) | 6-11 m<br>(n=7) | 12-24<br>m<br>(n=30) | 2-4 y<br>(n=35) | 5-9 y<br>(n=28) | 10-17<br>y<br>(n=18) | 18-29<br>y<br>(n=31) | 30-39<br>y<br>(n=15) | 40-49<br>y<br>(n=12) | 50-59<br>y<br>(n=10) | 60-69<br>y<br>(n=10) | >70y<br>(n=11) |
|----------------------------------------|--------------|--------------|-----------------|-----------------|----------------------|-----------------|-----------------|----------------------|----------------------|----------------------|----------------------|----------------------|----------------------|----------------|
| <b>Lymphocytes</b>                     | 2040-5688    | 1818-8667    | 2443-9955       | 4821-8531       | 2356-<br>13275       | 1620-6856       | 1827-4564       | 1238-4792            | 895-3684             | 877-3119             | 1139-3192            | 1836-2977            | 1531-4891            | 1795-3934      |
| <b>Total B-cells</b>                   | 347-1053     | 108-961      | 470-4327        | 896-2316        | 353-2300             | 232-1637        | 157-725         | 173-1194             | 56-470               | 41-391               | 48-314               | 90-413               | 68-384               | 42-242         |
| <b>PreGC<br/>B-cells</b>               | 347-1053     | 108-955      | 446-3911        | 652-1956        | 300-2255             | 175-1348        | 70-573          | 107-1040             | 22-291               | 14-298               | 29-195               | 33-265               | 29-302               | 16-233         |
| <b>PostGC<br/>B-cells</b>              | 0-0          | 0-6          | 6-415           | 94-361          | 45-466               | 44-491          | 68-276          | 35-173               | 18-232               | 23-176               | 19-192               | 39-160               | 39-145               | 9-81           |
| <b>Unswt<br/>PostGC</b>                | 0-0          | 0-2          | 3-356           | 32-272          | 23-280               | 22-333          | 23-155          | 18-89                | 7-124                | 8-76                 | 10-129               | 14-84                | 22-79                | 2-33           |
| <b>Swt<br/>PostGC</b>                  | 0-0          | 0-4          | 3-59            | 18-103          | 23-187               | 21-199          | 36-182          | 14-101               | 11-125               | 12-121               | 9-63                 | 25-101               | 13-65                | 7-56           |
| <b>T-cells</b>                         | 1186-4113    | 1476-8327    | 1680-7754       | 3764-6289       | 1900-9345            | 852-5333        | 1352-3275       | 930-3477             | 564-2935             | 612-2156             | 743-2316             | 1413-2379            | 1110-2941            | 636-3030       |
| <b>CD4+CD8-<br/>T-cells</b>            | 952-3097     | 1092-5341    | 1273-5633       | 2093-4769       | 617-5959             | 516-3448        | 776-1815        | 576-1891             | 207-1900             | 384-1303             | 501-1654             | 815-1769             | 345-1386             | 410-1474       |
| <b>Naïve<br/>CD4+CD8-</b>              | 920-2897     | 1092-5341    | 1092-5337       | 1748-4201       | 360-5273             | 276-2902        | 424-1393        | 264-1484             | 74-1173              | 89-683               | 83-676               | 196-1057             | 75-643               | 27-939         |
| <b>CM/TM<br/>CD4+CD8-</b>              | 12-199       | 0-692        | 0-684           | 233-630         | 252-1135             | 152-802         | 206-565         | 244-593              | 117-886              | 229-616              | 235-589              | 360-784              | 238-764              | 173-738        |
| <b>EM<br/>CD4+CD8-</b>                 | 0-0          | 0-3          | 2-37            | 5-33            | 3-71                 | 9-66            | 10-95           | 27-222               | 14-500               | 14-211               | 25-137               | 25-208               | 30-476               | 36-539         |
| <b>TD<br/>CD4+CD8-</b>                 | 0-0          | 0-0          | 0-8             | 0-4             | 0-6                  | 0-43            | 0-79            | 0-46                 | 0-87                 | 0-38                 | 0-663                | 0-356                | 0-92                 | 0-219          |
| <b>CD4-CD8+<br/>T-cells</b>            | 213-1138     | 340-2827     | 354-2006        | 720-1271        | 364-2498             | 188-1805        | 366-1171        | 261-1189             | 160-1103             | 198-889              | 133-719              | 194-1432             | 316-1520             | 202-1571       |
| <b>Naïve<br/>CD4-CD8+</b>              | 200-1010     | 340-2827     | 330-1841        | 564-1040        | 222-2178             | 126-1130        | 175-730         | 94-986               | 33-737               | 37-325               | 29-386               | 65-223               | 5-223                | 2-165          |
| <b>CM/TM<br/>CD4-CD8+</b>              | 7-166        | 0-226        | 24-500          | 59-215          | 34-882               | 25-309          | 62-456          | 76-427               | 54-422               | 87-424               | 59-348               | 78-453               | 97-321               | 42-305         |
| <b>EM<br/>CD4-CD8+</b>                 | 0-0          | 0-0          | 0-146           | 1-37            | 0-129                | 0-151           | 1-51            | 6-62                 | 5-69                 | 2-515                | 6-115                | 2-323                | 11-363               | 1-925          |
| <b>CD27+ TD<br/>CD4-CD8+</b>           | 0-0          | 0-0          | 0-432           | 0-100           | 0-238                | 0-385           | 0-83            | 3-93                 | 0-144                | 1-95                 | 7-118                | 16-457               | 4-173                | 17-576         |
| <b>CD27- TD<br/>CD4-CD8+</b>           | 0-0          | 0-0          | 0-255           | 0-66            | 0-826                | 0-735           | 0-325           | 3-284                | 1-240                | 1-273                | 0-196                | 8-500                | 0-905                | 12-736         |
| <b>CD4-CD8-<br/>TCRgd-<br/>T-cells</b> | 0-37         | 2-171        | 9-66            | 15-73           | 20-141               | 3-104           | 13-80           | 8-53                 | 5-79                 | 6-26                 | 4-24                 | 6-21                 | 4-27                 | 2-14           |
| <b>CD4-CD8-<br/>TCRgd+<br/>T-cells</b> | 18-121       | 25-162       | 25-435          | 128-335         | 86-537               | 44-784          | 66-416          | 56-332               | 11-470               | 11-173               | 33-231               | 7-99                 | 22-251               | 4-1060         |
| <b>NK cells</b>                        | 200-1305     | 73-721       | 167-1359        | 237-1146        | 104-2436             | 138-1759        | 106-1348        | 109-1021             | 81-615               | 130-739              | 161-672              | 150-433              | 195-1737             | 124-918        |
